# Supplementary material for: Matrix-isolated trifluoromethylthiyl radical: sulfur atom transfer, isomerization and oxidation reactions
Source: Royal Society of Chemistry journal article supplement (doi:10.1039/d1cc04654c), 2021-01-01
Supplement: d1cc04654c1.pdf [file d1cc04654c1.pdf]

## Supporting Information

### **Matrix-isolated trifluoromethylthiyl radical: sulfur atom transfer, isomerization and oxidation reactions**

Bifeng Zhu,<sup>a</sup> Zhuang Wu,<sup>a</sup> Lina Wang,<sup>a</sup> Bo Lu,<sup>a</sup> Tarek Trabelsi,<sup>b</sup> Joseph S. Francisco,<sup>b,\*</sup> and  
Xiaoqing Zeng<sup>a,\*</sup>

<sup>a</sup>Department of Chemistry, Fudan University, Shanghai 200433 (China)

E-mail: xqzeng@fudan.edu.cn

<sup>b</sup>Department of Earth and Environment Science and Department of Chemistry, University of  
Pennsylvania, Pennsylvania, 19104-6243 (USA)

E-mail: frjoseph@sas.upenn.edu

## Table of Contents

|                                                                                                                                             |     |
|---------------------------------------------------------------------------------------------------------------------------------------------|-----|
| Experimental and computational details.....                                                                                                 | S3  |
| IR spectra of matrix-isolated $\text{CF}_3\text{S}(\text{O})\text{SCF}_3/\text{Ar}$ and the HVFP products (Figure S1).....                  | S5  |
| IR spectra of matrix-isolated $\text{CF}_3\text{S}(\text{O})\text{SCF}_3/\text{Ne}$ and the HVFP products (Figure S2).....                  | S6  |
| IR spectra of matrix-isolated $\text{CF}_3\text{S}(\text{O})\text{SCF}_3/\text{N}_2$ and the HVFP products (Figure S3) .....                | S7  |
| IR spectra showing the changes of the HVFP products of $\text{CF}_3\text{S}(\text{O})\text{SCF}_3/\text{Ar}$ by annealing (Figure S4).....  | S8  |
| IR spectra showing the changes of the HVFP products of $\text{CF}_3\text{S}(\text{O})\text{SCF}_3/\text{N}_2$ by annealing (Figure S5)..... | S9  |
| IR difference spectra showing the photochemistry (266 nm) of $\text{CF}_3\text{S}\bullet$ in $\text{N}_2$ -matrix (Figure S6).....          | S10 |
| IR difference spectra showing the photochemistry (193 nm) of $\text{CF}_3\text{S}\bullet$ in $\text{N}_2$ -matrix (Figure S7).....          | S11 |
| IR difference spectra showing the photochemistry (193 nm) of $\text{CF}_3\text{S}\bullet$ in Ar-matrix (Figure S8).....                     | S12 |
| IR difference spectra showing the photochemistry (365 nm) of $\text{CF}_3\text{S}\bullet$ in CO-matrix (Figure S9).....                     | S13 |
| IR spectra of matrix-isolated HVFP products of $\text{CF}_3\text{S}(\text{O})\text{SCF}_3/\text{O}_2/\text{N}_2$ (Figure S10) .....         | S14 |
| IR spectra of matrix-isolated HVFP products of $\text{CF}_3\text{S}(\text{O})\text{SCF}_3/\text{O}_2/\text{Ne}$ (Figure S11) .....          | S15 |
| Calculated IR data of $\text{CF}_3\text{SSO}\bullet$ and its isomers (Table S1) .....                                                       | S16 |
| Calculated IR data of $\text{CF}_3\text{S}\bullet$ and $\bullet\text{CF}_2\text{SF}$ (Table S2) .....                                       | S17 |
| Calculated vertical transitions of $\text{CF}_3\text{S}\bullet$ (Table S3) .....                                                            | S17 |
| Experimental IR data of $\bullet\text{CF}_2\text{SF}$ (Table S4) .....                                                                      | S17 |
| Experimental IR data of $\text{CF}_3\text{SOO}\bullet$ (Table S5) .....                                                                     | S18 |
| Calculated vertical transitions for $\text{CF}_3\text{SOO}\bullet$ (Table S6) .....                                                         | S18 |
| Calculated IR data of $\text{CF}_3\text{SOO}\bullet$ and its isomers (Table S7) .....                                                       | S19 |
| Calculated vertical transitions of $\bullet\text{CF}_2\text{SF}$ (Table S8) .....                                                           | S20 |
| Calculated atomic coordinates and energies for all optimized structures .....                                                               | S21 |
| References.....                                                                                                                             | S25 |

## Experimental and computational details

### Sample preparation

Bis(trifluoromethyl)disulfane oxide,  $\text{CF}_3\text{S}(\text{O})\text{SCF}_3$ , was synthesized by the reaction of  $\text{CF}_3\text{S}(\text{O})\text{Cl}$  (95%, Macklin) with  $\text{AgSCF}_3$  (>95%, TCI). Briefly, commercial trifluoromethylsulfinyl chloride (1 mmol, 0.15g) was condensed into a reaction vessel containing silver trifluoromethanethiolate (1.5mmol, 0.31g) and propylene carbonate (1 mL). The mixture was stirred at  $-50\text{ }^\circ\text{C}$  for 72 h. The volatile products were separated by passing through three successive cold U-traps ( $-64$ ,  $-86$ ,  $-196\text{ }^\circ\text{C}$ ). Pure  $\text{CF}_3\text{S}(\text{O})\text{SCF}_3$  was retained in the middle trap. The purity of the substance was checked by gas phase IR (INSA OPTICS FOLI10-R,  $\nu = 1224, 1181, 1112, 763\text{ cm}^{-1}$ ) and NMR spectroscopy (Bruker Avance III HD 500 spectrometer).  $^{13}\text{C}$  NMR (125 MHz,  $\text{CDCl}_3$ ):  $\delta = 124.7$  (q,  $-\text{S}(\text{O})\text{CF}_3$ ),  $128.5$  (q,  $-\text{SCF}_3$ ) ppm.  $^{19}\text{F}$  NMR (470 MHz,  $\text{CDCl}_3$ ):  $\delta = -33.8$  (s,  $-\text{S}(\text{O})\text{CF}_3$ ),  $-68.8$  (s,  $-\text{SCF}_3$ ).

Gases Ar ( $\geq 99.999\%$ , Linde),  $\text{N}_2$  ( $\geq 99.999\%$ , Linde), Ne ( $\geq 99.999\%$ , Messer), and  $\text{O}_2$  ( $\geq 99.999\%$ , Linde) were used without further purification. For the isotope labeling experiments,  $^{15}\text{N}_2$  (98 atom %, Aldrich) and  $^{18}\text{O}_2$  (97 atom %, Aldrich) were used.

### Matrix-isolation IR spectroscopy

Matrix IR spectra were recorded on a FT-IR spectrometer (Bruker 70V) in a reflectance mode using a transfer optic. A KBr beam splitter and MCT detector were used in the mid-IR region ( $5000\text{--}400\text{ cm}^{-1}$ ). Typically, 200 scans at a resolution of  $0.5\text{ cm}^{-1}$  were co-added for each spectrum. Gaseous  $\text{CF}_3\text{S}(\text{O})\text{SCF}_3$  was mixed by Ar, Ne or  $\text{N}_2$  (1:1000). As for the oxidation experiment,  $\text{CF}_3\text{S}(\text{O})\text{SCF}_3$  was mixed by oxygen and Ar, Ne or  $\text{N}_2$  (1:1000) at room temperature. Then the mixture (sample: $\text{O}_2$ :dilution gas=1:50:1000, estimated) was passed through an aluminum oxide furnace (o.d 2.0 mm, i.d. 1.0 mm), which can be heated over a length of ca. 25 mm by tantalum wire (o.d. 2.0 mm, resistance 0.4  $\Omega$ ) and immediately deposited ( $2\text{ mmol h}^{-1}$ ) in a high vacuum ( $\sim 10^{-6}\text{ pa}$ ) onto the Au-plated Cu block matrix support (10 K for  $\text{N}_2$  and Ar matrix, 3 K for Ne matrix) using a closed-cycle helium cryostat (Sumitomo Heavy Industries, SRDK-408D2-F50H) inside the vacuum chamber. Temperatures at the second stage of the cold head were controlled and monitored using an East Changing TC 290 digital cryogenic temperature controller a Silicon Diode (DT-670). The voltage and current used in the pyrolysis experiments were 5.50 V and 3.12 A, respectively. Photolysis experiments were performed using ArF excimer laser (Gamlaser EX5/250, 3 Hz, 193 nm),  $\text{Nd}^{3+}$ : YAG laser (266 nm, MPL-F-266, 10 mW), UV lamp (365 nm, 24 W) and blue-light LED (440 nm).

### Matrix-isolation UV-vis spectroscopy

Matrix UV-vis spectra were recorded on a Perkin Elmer Lambda 850+ spectrometer (spectral range of 190–800 nm with a scanning speed of  $1\text{ nm s}^{-1}$ ). The high-vacuum flash pyrolysis products using the similar furnace (o.d 2.0 mm, i.d. 1.0 mm) were deposited onto the  $\text{CaF}_2$  matrix support using a closed-cycle helium cryostat (Sumitomo Heavy Industries, SRDK-408D2-F50H) inside the vacuum chamber.

Temperatures at the second stage of the cold head were controlled and monitored using a Lake Shore 335 digital cryogenic temperature controller a Silicon Diode (DT-670). The voltage and current used in the pyrolysis experiments were 5.50 V and 3.12 A, respectively. Photolysis experiments were performed using Ar Fexcimer laser (Gamlaser EX5/250, 3 Hz, 193 nm), Nd<sup>3+</sup>: YAG laser (266 nm, MPL-F-266, 10 mW), UV lamp (365 nm, 24 W) and blue-light LED (440 nm).

### Quantum chemical calculation methods

Structures and IR frequencies of stationary points were calculated using the DFT B3LYP<sup>[1]</sup>, BP86<sup>[2]</sup> and MPW1PW91<sup>[3]</sup> methods with the 6-311+G(3df) basis set. Accurate relative energies of the species were further calculated using the complete basis set (CBS-QB3).<sup>[4]</sup> Local minima were confirmed by vibrational frequency analysis, and transition states were further confirmed by intrinsic reaction coordinate (IRC) calculations.<sup>[5]</sup> The time-dependent TD-B3LYP/6-311+G(3df)<sup>[6]</sup> and EOM-CCSD/aug-cc-pV(T+d)Z<sup>[7]</sup> methods were performed for the prediction of vertical excitations. These computations were performed using the Gaussian 09 software package.<sup>[8]</sup> To provide detailed insight into the lowest excited states of CF<sub>3</sub>S•, •CF<sub>2</sub>SF and CF<sub>3</sub>SOO•, calculations with the complete active space self-consistent field (CASSCF),<sup>[9]</sup> followed by the internally contracted multireference configuration interaction including the Davidson correction MRCI+Q<sup>[10]</sup> were used. These calculations were done using the optimized equilibrium geometries at the CCSD(T)/aug-cc-pv(T+d)z level. All these ab initio calculations were performed with MOLPRO 2019 program.<sup>[11]</sup>

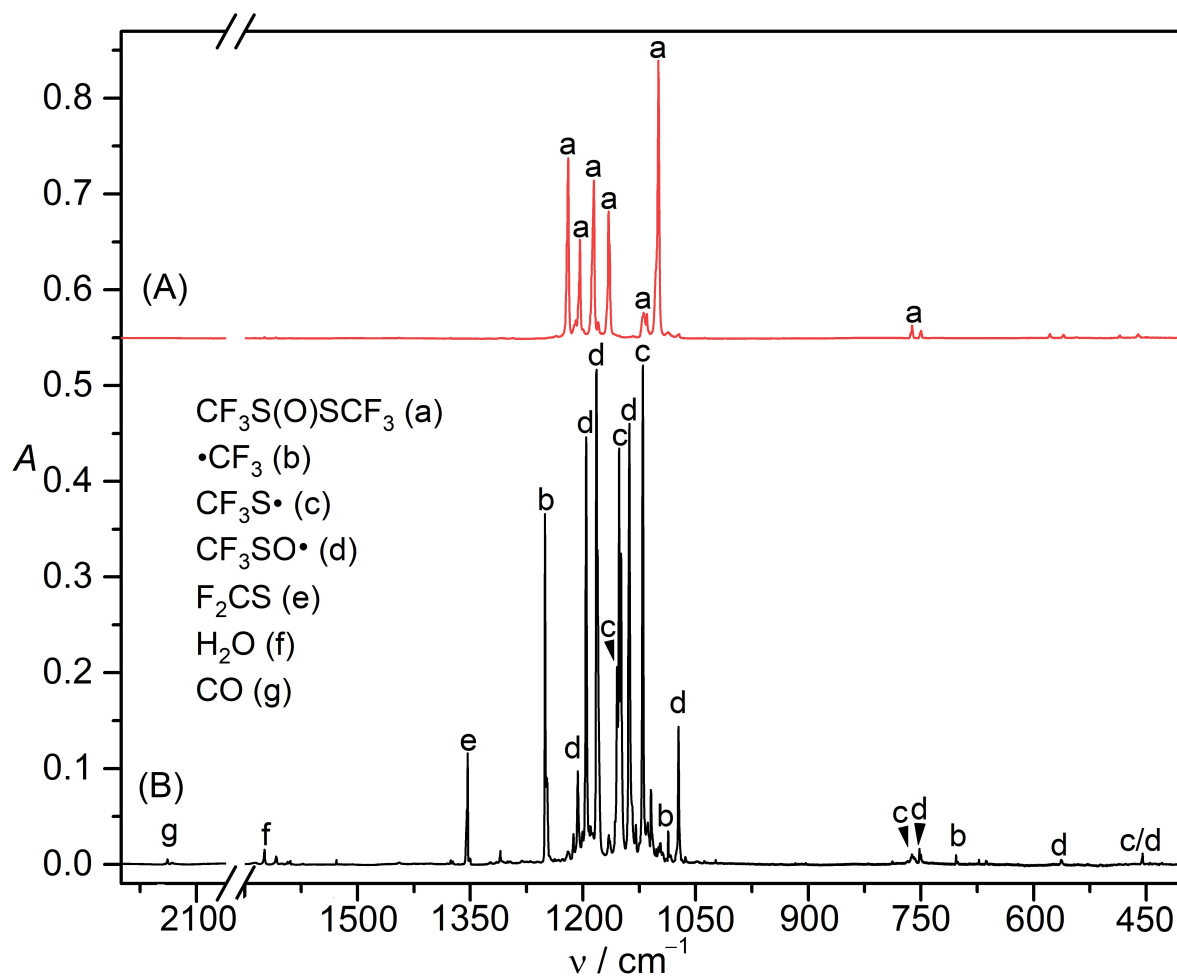

**Figure S1.** (A) IR spectrum of a 1:1000 mixture of  $\text{CF}_3\text{S(O)SCF}_3/\text{Ar}$  at 10 K. (B) IR spectrum of the matrix-isolated high-vacuum flash pyrolysis (HVFP, 400 °C) products of a 1:1000 mixture of  $\text{CF}_3\text{S(O)SCF}_3/\text{Ar}$  at 10 K.

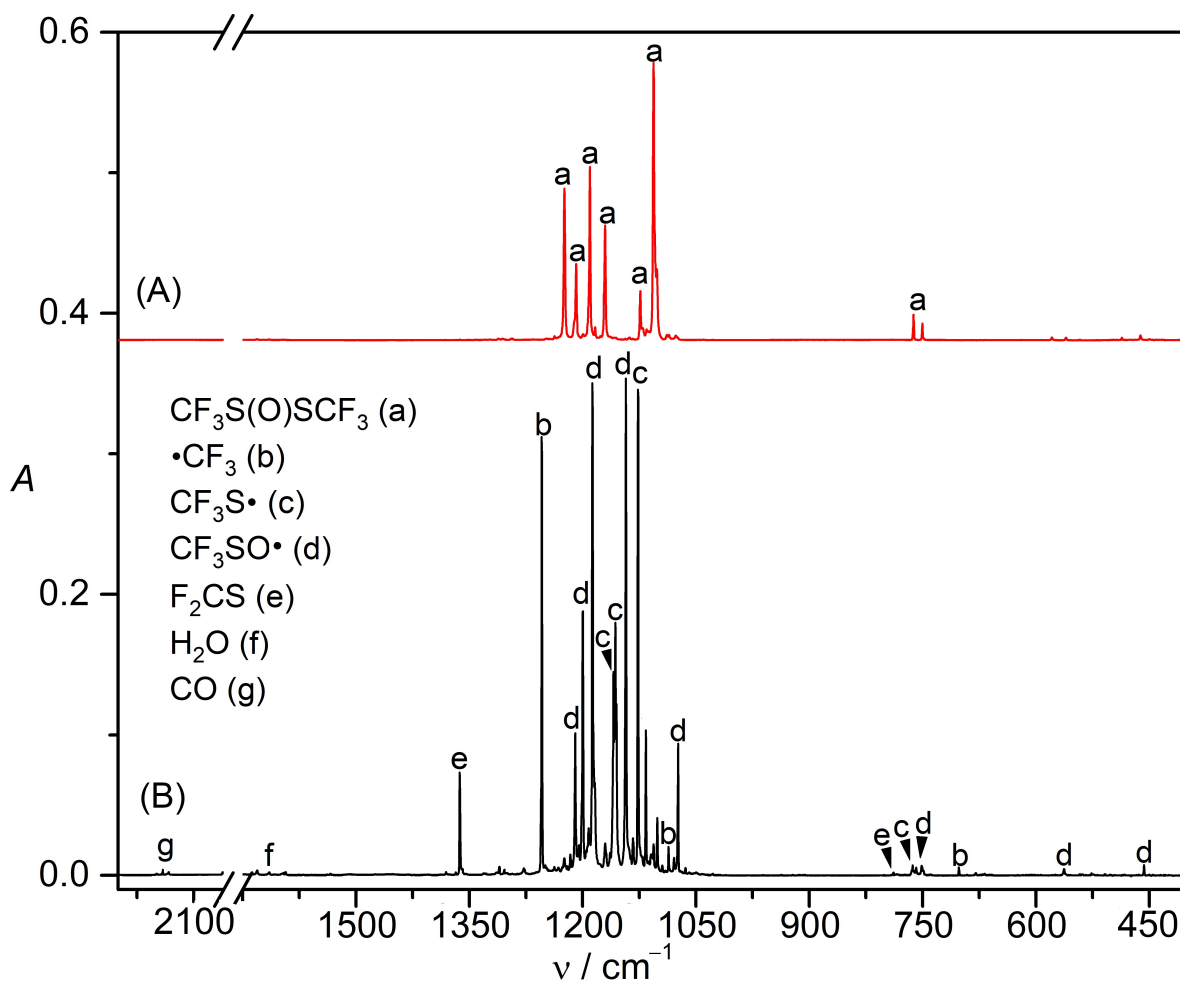

**Figure S2.** (A) IR spectrum of a 1:1000 mixture of  $\text{CF}_3\text{S(O)SCF}_3/\text{Ne}$  at 3 K. (B) IR spectrum of the matrix-isolated high-vacuum flash pyrolysis (HVFP, 400 °C) products of a 1:1000 mixture of  $\text{CF}_3\text{S(O)SCF}_3/\text{Ne}$  at 3 K.

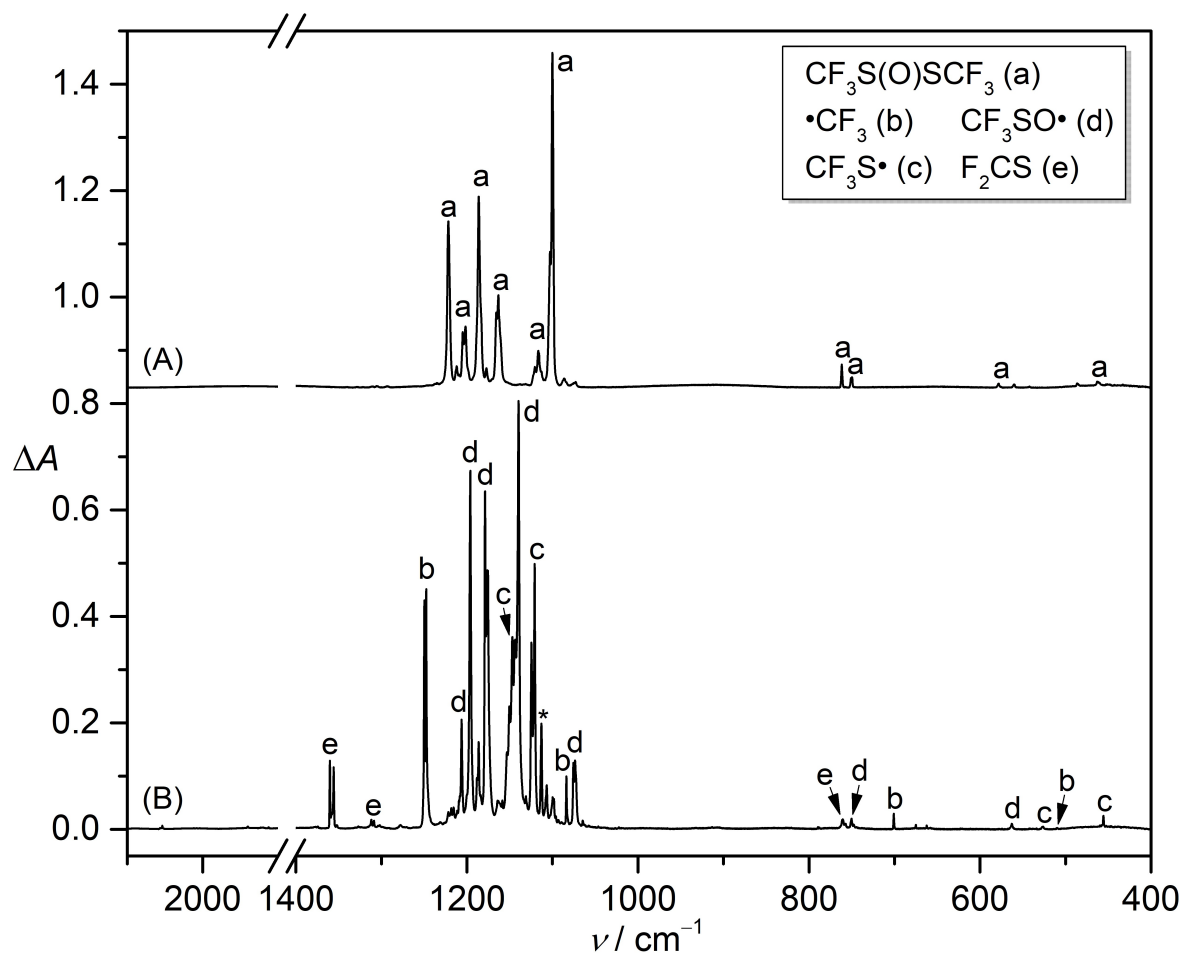

**Figure S3.** (A) IR spectrum of a 1:1000 mixture of  $\text{CF}_3\text{S}(\text{O})\text{SCF}_3/\text{N}_2$  at 10 K. (B) IR spectrum of the matrix-isolated high-vacuum flash pyrolysis (HVFP, 400 °C) products of a 1:1000 mixture of  $\text{CF}_3\text{S}(\text{O})\text{SCF}_3/\text{N}_2$  at 10 K.

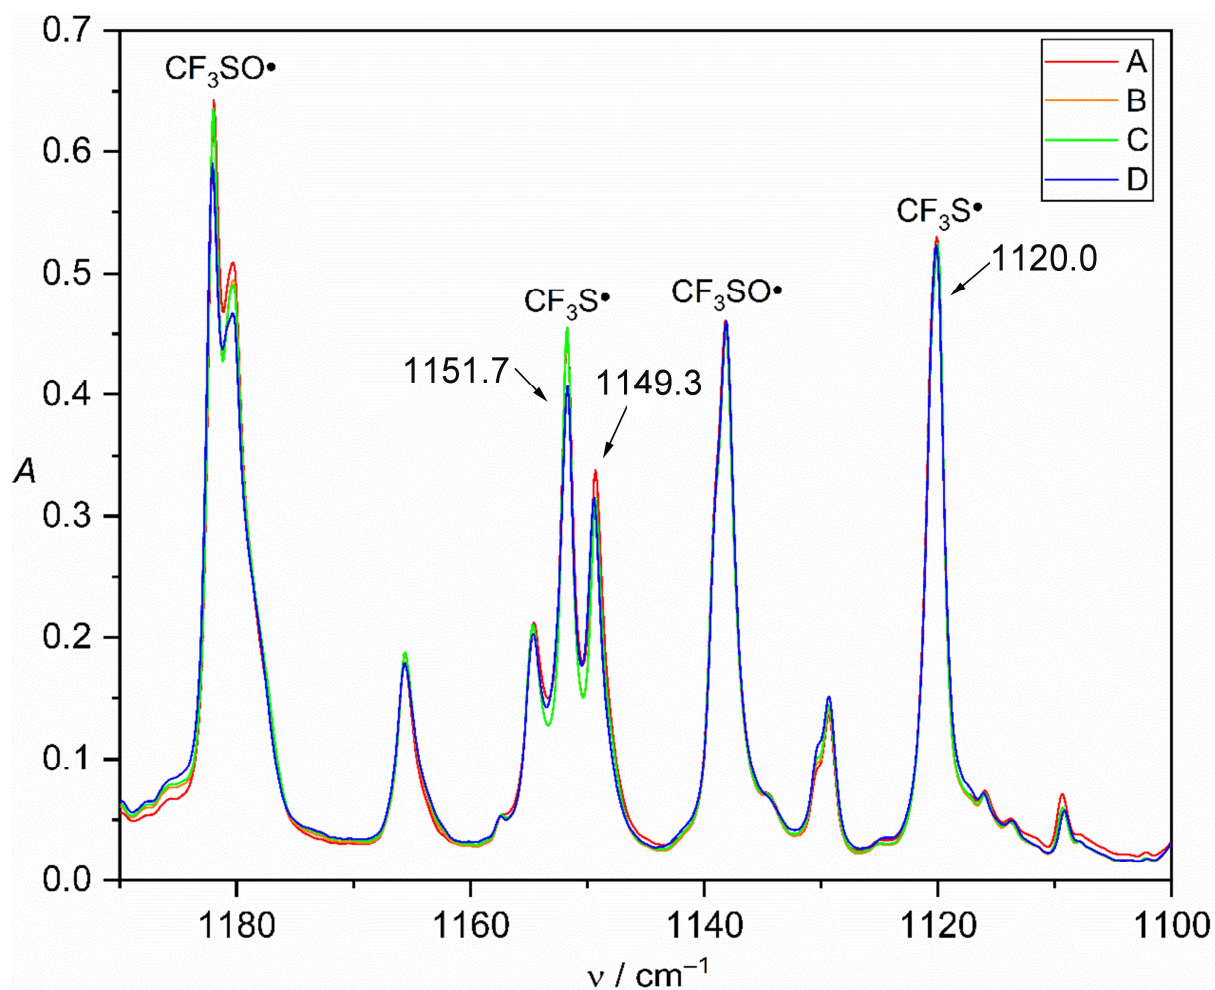

**Figure S4.** IR spectra in the region of 1190–1100 cm<sup>-1</sup> obtained: A) 1 h of sample deposition of high-vacuum flash pyrolysis products of CF<sub>3</sub>S(O)SCF<sub>3</sub>/Ar at 10 K, B) after annealing the matrix to 25 K for 1 min, C) after annealing the matrix to 25 K for 5 min, D) after keeping the matrix at 25 K.



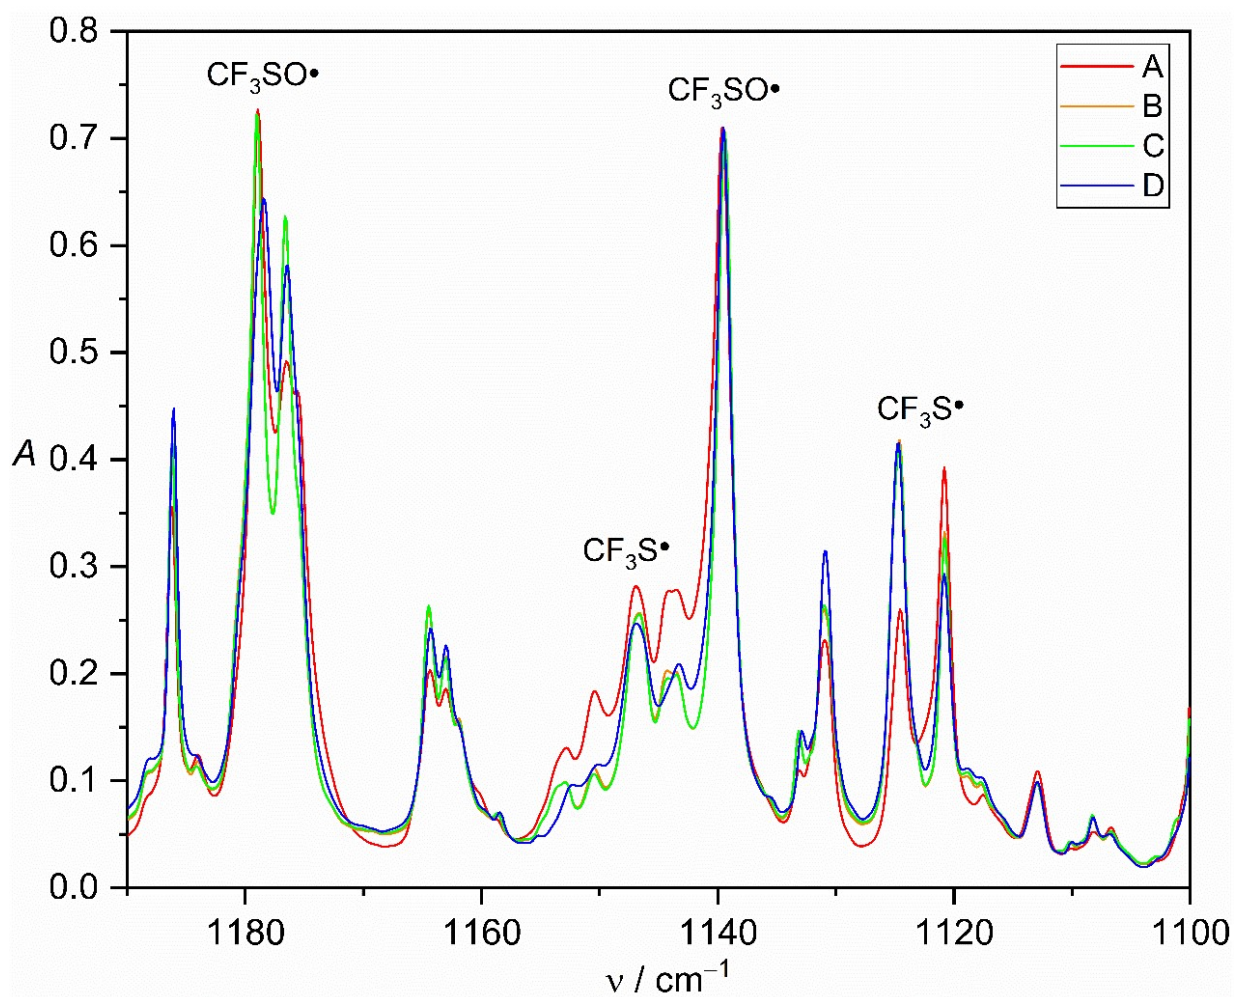

**Figure S5.** IR spectra in the region of 1190–1100  $\text{cm}^{-1}$  obtained: A) 1 h of sample deposition of high-vacuum flash pyrolysis products of  $\text{CF}_3\text{S(O)SCF}_3/\text{N}_2$  at 10 K, B) after annealing the matrix to 25 K for 30 s, C) after annealing the matrix to 25 K for 5 min, D) after keeping the matrix at 25 K.

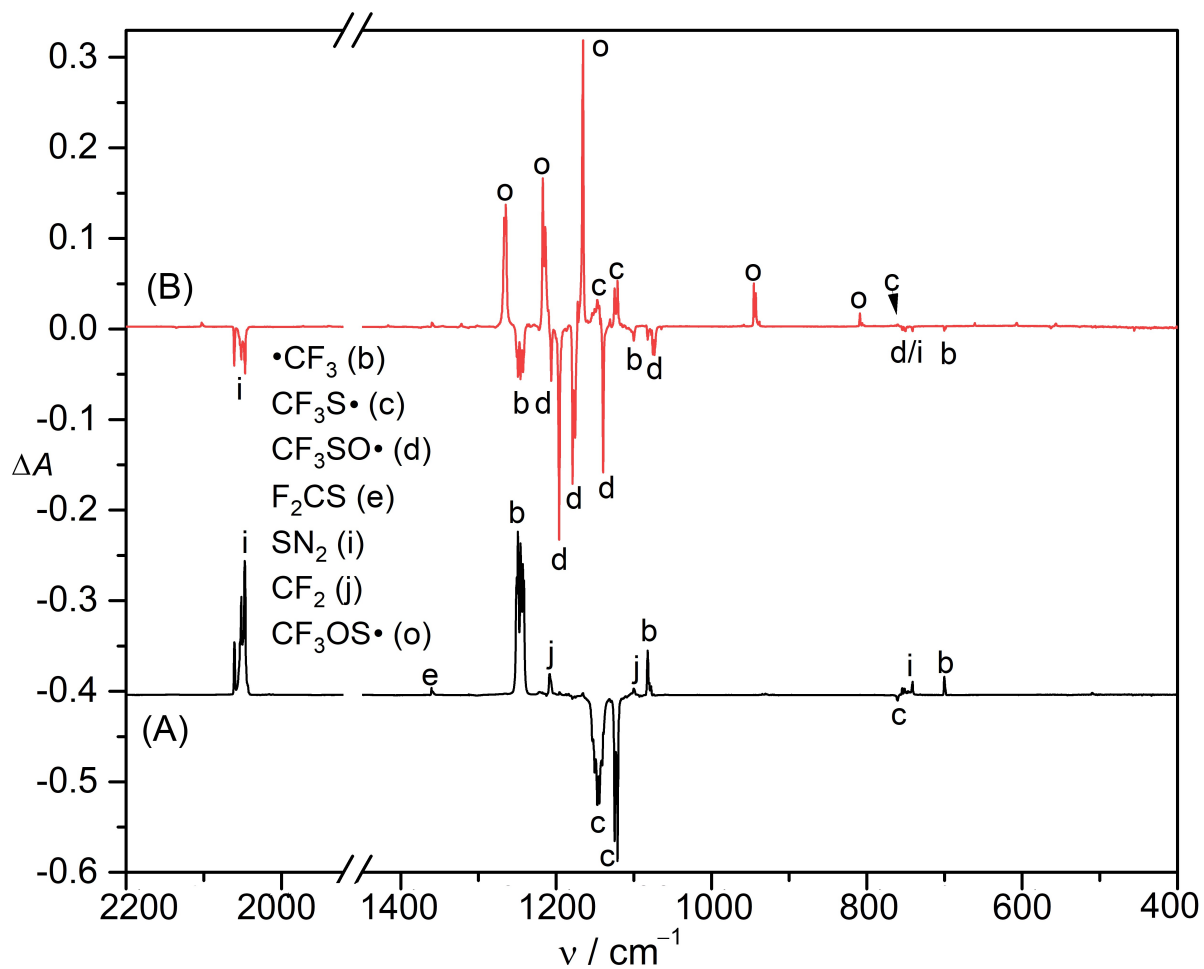

**Figure S6.** (A) IR difference spectrum showing the changes of the HVFP products of a 1:1000 mixture of  $\text{CF}_3\text{S}(\text{O})\text{SCF}_3/\text{N}_2$  upon UV-light irradiation (365 nm, 40 min) in a solid  $\text{N}_2$ -matrix at 10 K. (B) IR difference spectrum showing the changes of the matrix upon further UV-laser irradiation (266 nm, 15 min) at 10 K.

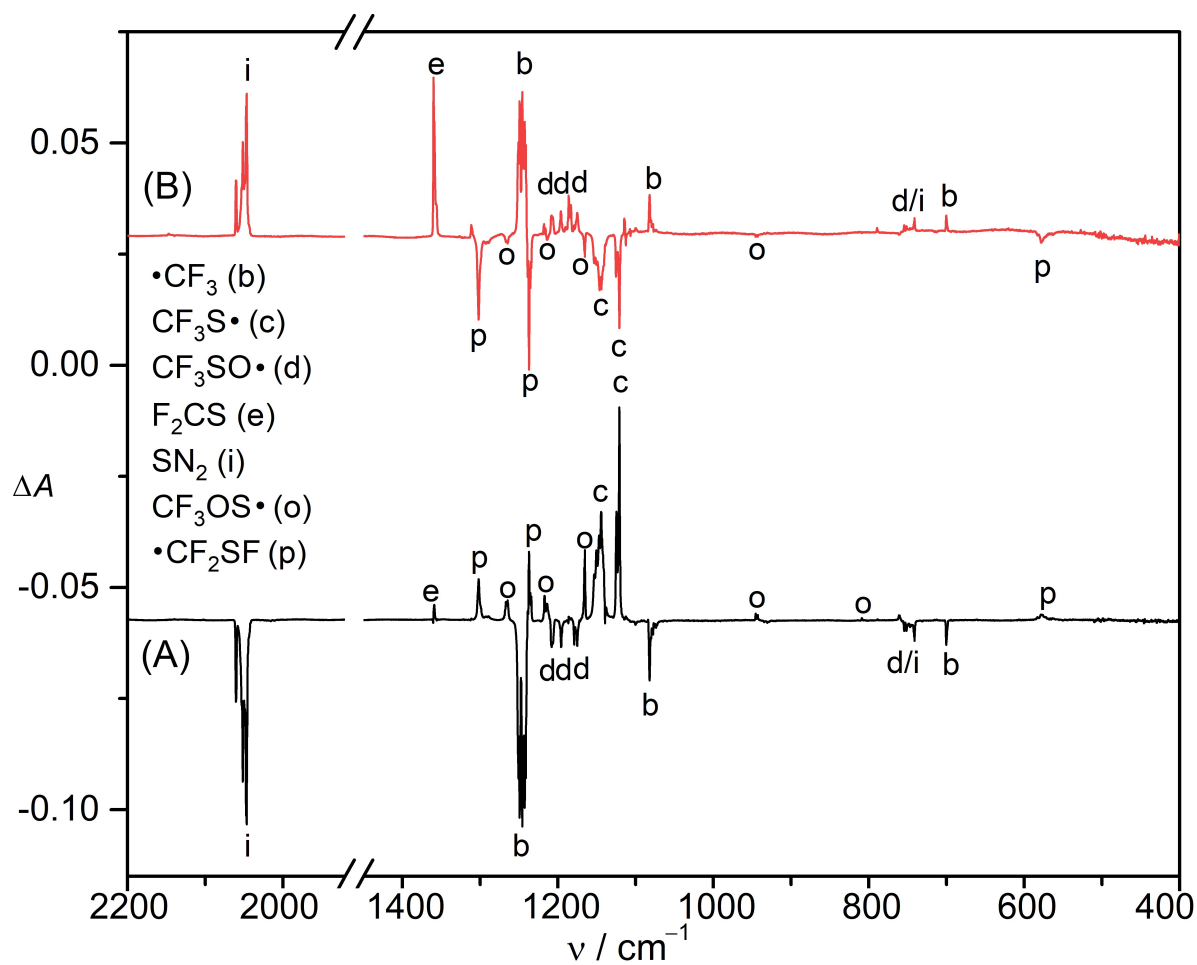

**Figure S7.** (A) IR difference spectrum showing the changes of the HVFP products of a 1:1000 mixture of  $\text{CF}_3\text{S}(\text{O})\text{SCF}_3/\text{N}_2$  upon an ArF excimer laser irradiation (193 nm, 30 min) in a solid  $\text{N}_2$ -matrix at 10 K. (B) IR difference spectrum showing the changes of the matrix upon further UV-light irradiation (365 nm, 5 min) at 10 K.

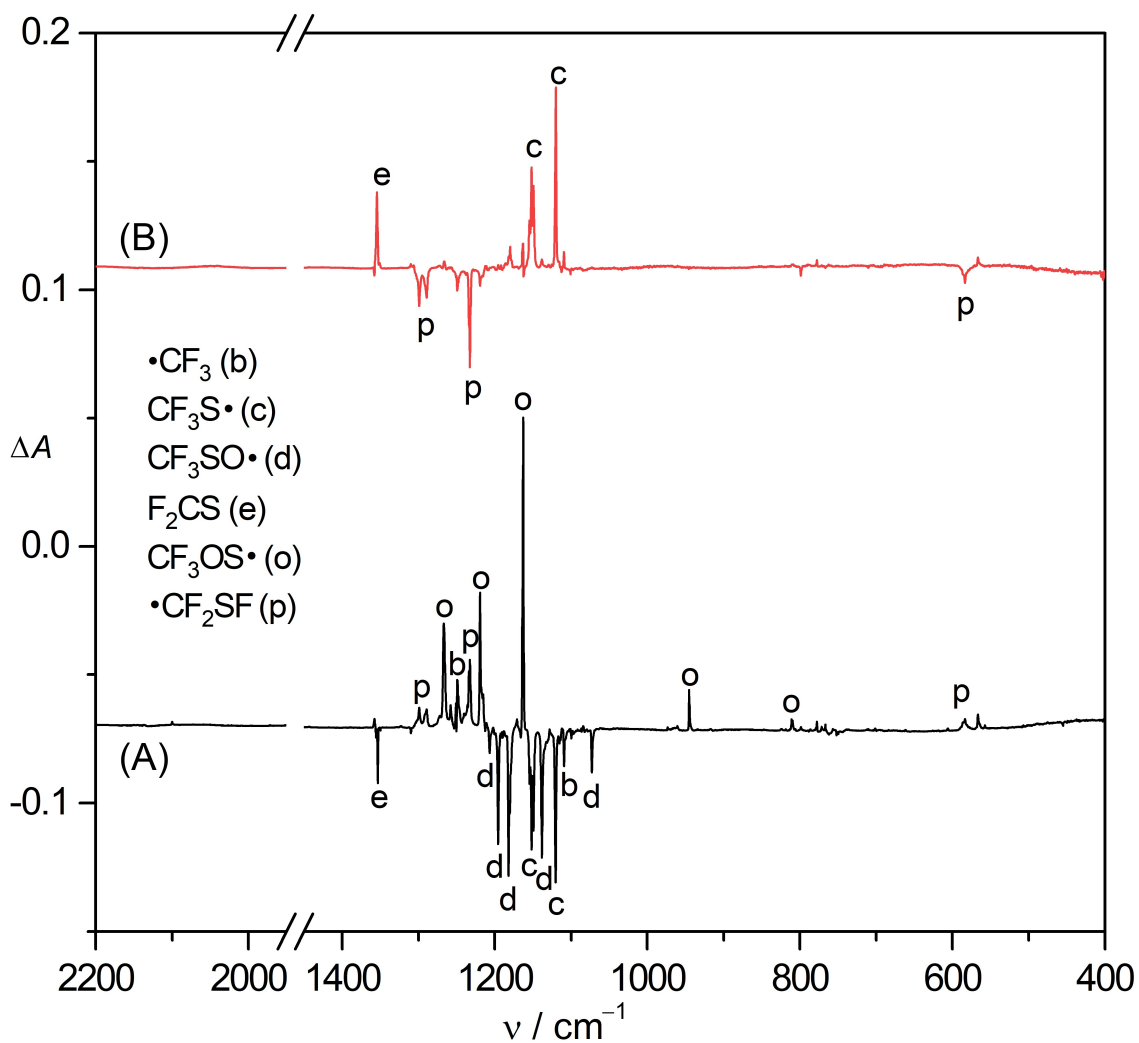

**Figure S8.** (A) IR difference spectrum showing the changes of the HVFP products of a 1:1000 mixture of  $\text{CF}_3\text{S}(\text{O})\text{SCF}_3/\text{Ar}$  upon an ArF excimer laser irradiation (193 nm, 35 min) in a solid Ar-matrix at 10 K. (B) IR difference spectrum showing the changes of the matrix upon further UV-light irradiation (365 nm, 10 min) at 10 K.

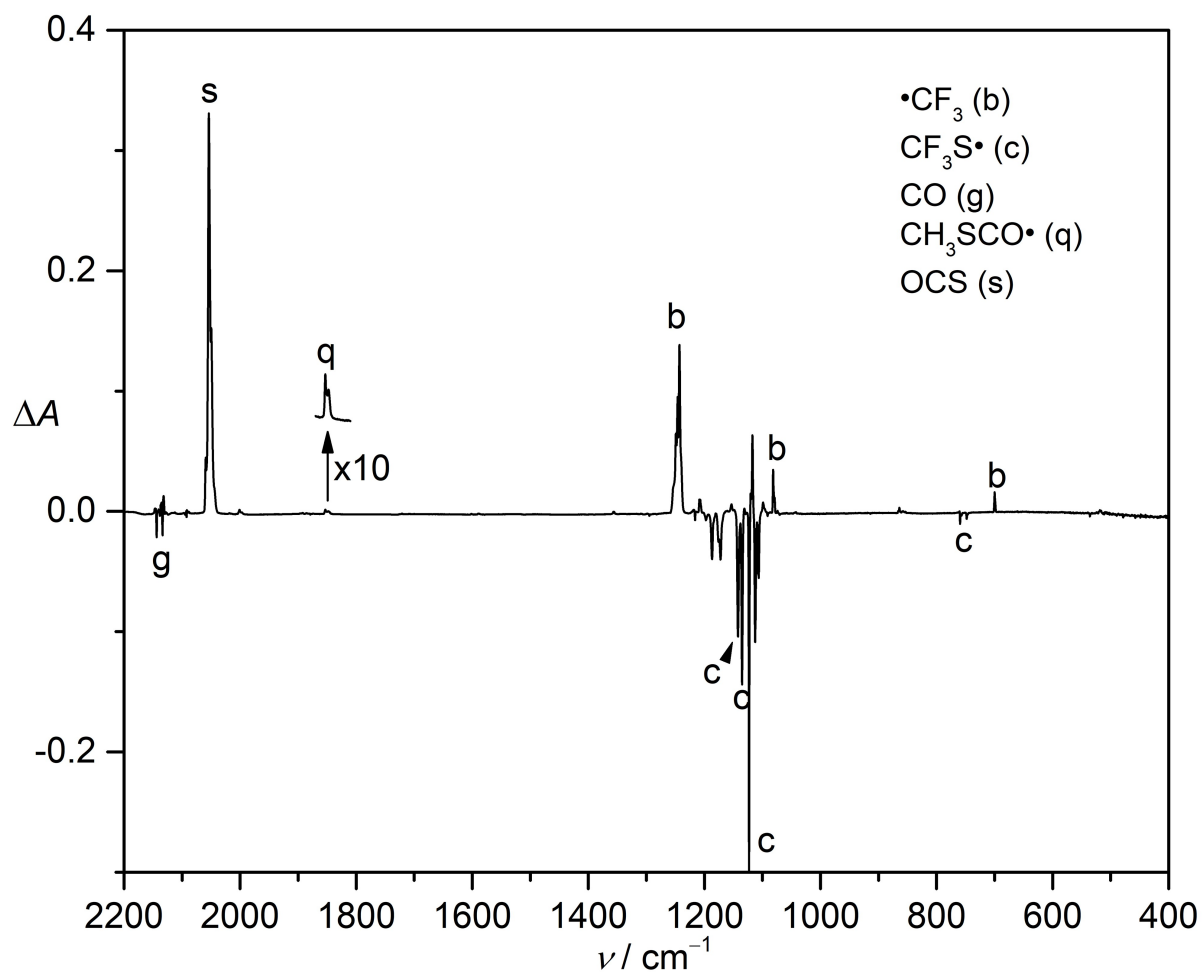

**Figure S9.** IR difference spectrum showing the changes of the HVFP products of a 1:600 mixture of  $\text{CF}_3\text{S(O)SCF}_3/\text{CO}$  upon UV-light irradiation (365 nm, 5 min) at 16 K.

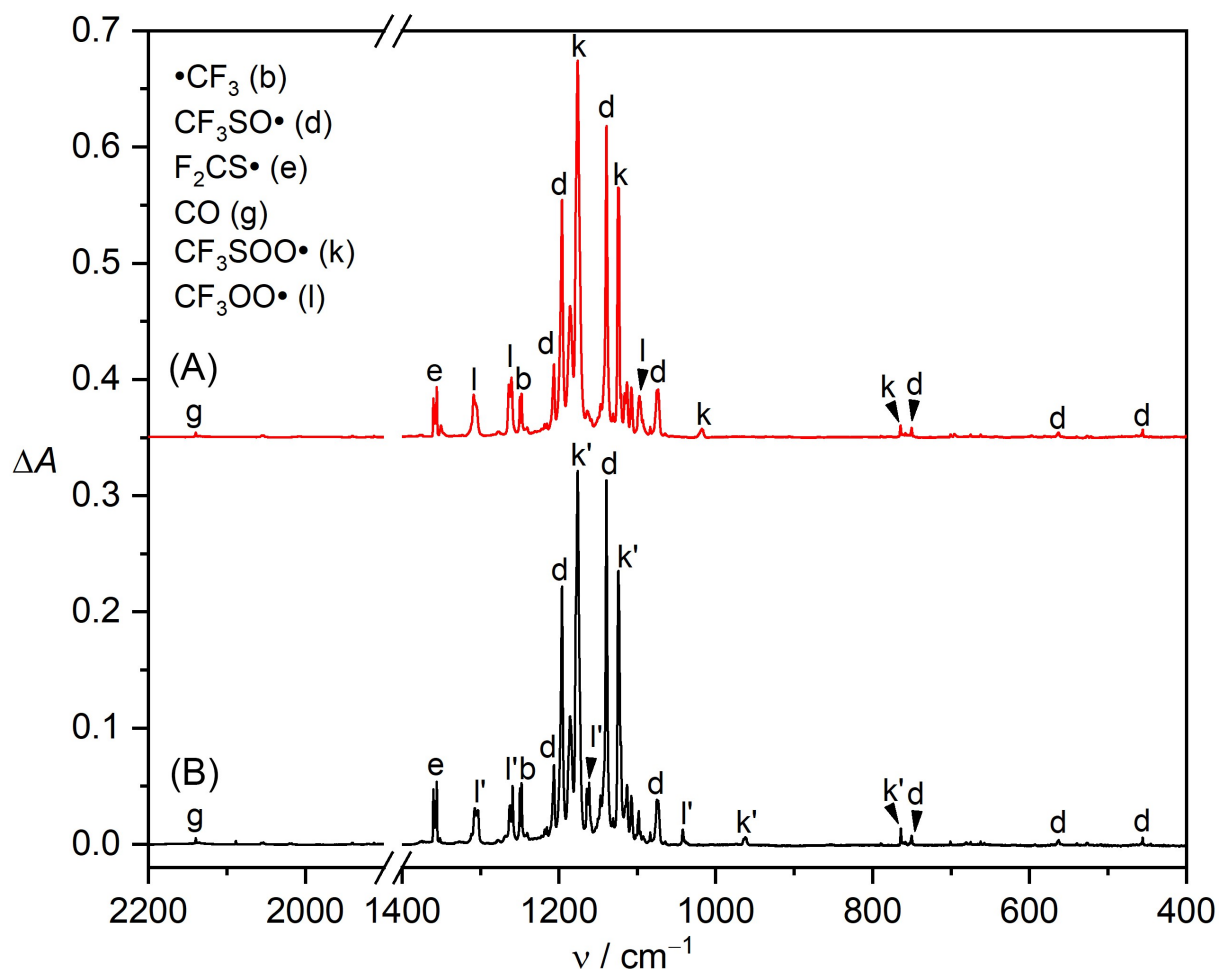

**Figure S10.** (A) IR spectrum of the HVFP products of a 1:50:1000 mixture of  $\text{CF}_3\text{S}(\text{O})\text{SCF}_3/\text{O}_2/\text{N}_2$  at 10 K. (B) IR spectrum of the HVFP products of a 1:25:25:1000 mixture of  $\text{CF}_3\text{S}(\text{O})\text{SCF}_3/\text{O}_2/^{18}\text{O}_2/\text{N}_2$  at 10 K.

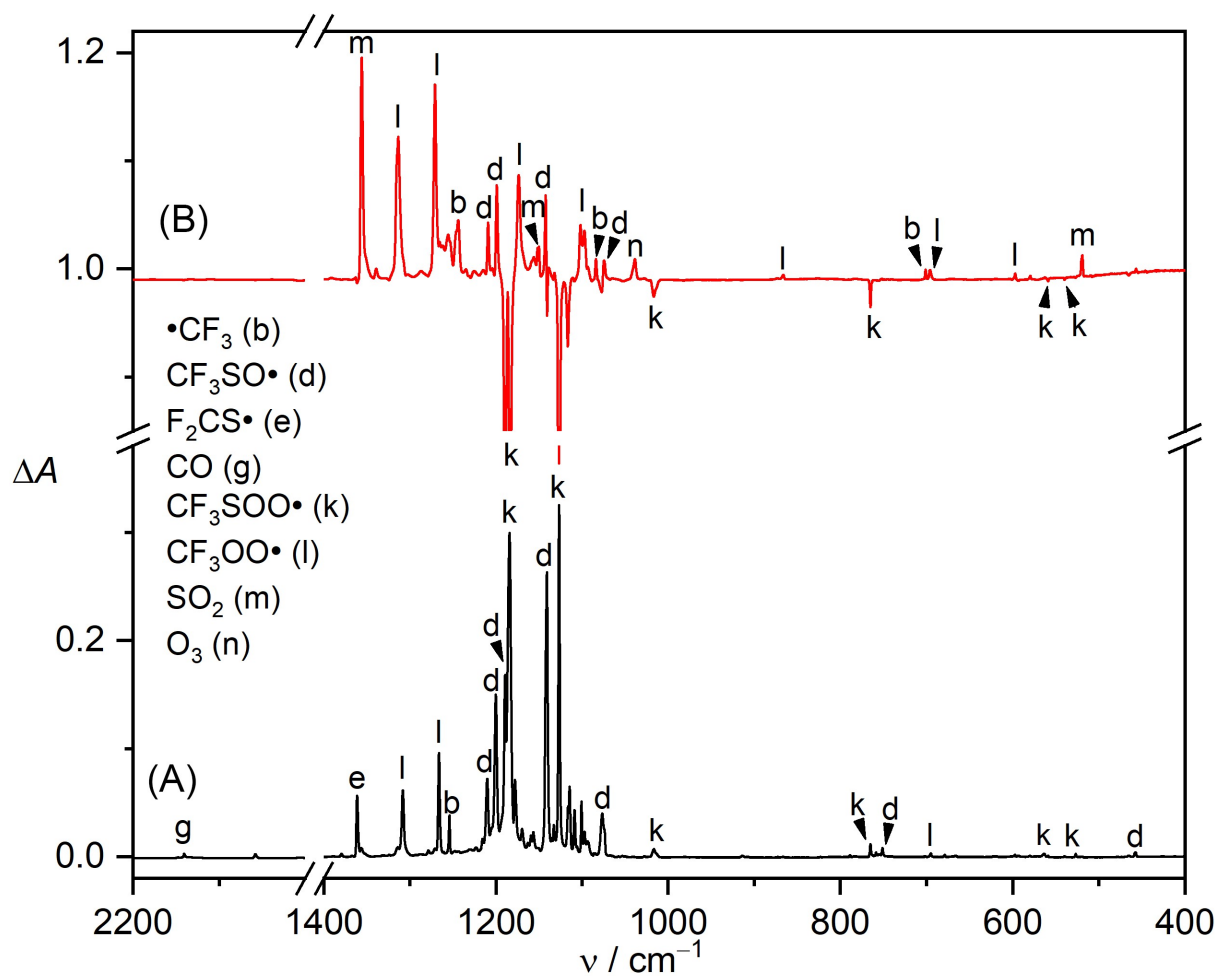

**Figure S11.** (A) IR spectrum of the HVFP products of a 1:50:1000 mixture of  $\text{CF}_3\text{S(O)SCF}_3/\text{O}_2/\text{Ne}$  at 3 K. (B) IR difference spectrum showing the change of the matrix upon blue-light LED irradiation (440 nm, 70 min) at 3 K.

**Table S1.** Calculated IR frequencies ( $\text{cm}^{-1}$ ) and intensity ( $\text{km mol}^{-1}$ , in parentheses) of  $\text{CF}_3\text{SSO}\bullet$  and its isomers at the MPW1PW91 and B3LYP methods using 6-311+G(3df) basis set.

| $\text{CF}_3\text{SSO}\bullet$ |              | $\text{CF}_3\text{SOS}\bullet$ |              | $\text{CF}_3\text{S(O)S}\bullet$ |              | $\text{CF}_3\text{OSS}\bullet$ |              |
|--------------------------------|--------------|--------------------------------|--------------|----------------------------------|--------------|--------------------------------|--------------|
| B3LYP                          | MPW1PW91     | B3LYP                          | MPW1PW91     | B3LYP                            | MPW1PW91     | B3LYP                          | MPW1PW91     |
| 1160.5 (222)                   | 1207.9 (218) | 1161.3 (220)                   | 1208.6 (222) | 1220.7 (283)                     | 1265.9 (285) | 1225.1 (486)                   | 1270.9 (446) |
| 1148.0 (234)                   | 1196.1 (232) | 1150.6 (238)                   | 1195.9 (240) | 1207.8 (253)                     | 1250.9 (254) | 1168.9 (610)                   | 1210.2 (341) |
| 1106.6 (92)                    | 1138.0 (101) | 1104.0 (417)                   | 1138.9 (407) | 1155.9 (43)                      | 1198.3 (48)  | 1157.6 (342)                   | 1205.3 (629) |
| 1074.0 (423)                   | 1106.4 (416) | 759.0 (14)                     | 798.5 (46)   | 1063.9 (411)                     | 1101.3 (400) | 912.1 (32)                     | 940.5 (42)   |
| 753.9 (23)                     | 774.0 (26)   | 756.2 (30)                     | 779.5 (14)   | 743.4(27)                        | 766.0 (23)   | 705.8 (57)                     | 738.4 (75)   |
| 550.7 (1)                      | 562.5 (2)    | 610.4 (9)                      | 658.1 (11)   | 572.6 (20)                       | 612.1 (26)   | 650.8 (52)                     | 676.9 (41)   |
| 536.4 (0.7)                    | 547.3 (1)    | 551.3 (1)                      | 564.6 (1)    | 540.8 (1)                        | 555.7 (0.8)  | 646.8 (1)                      | 660.9 (2)    |
| 442.7 (26)                     | 471.4 (41)   | 532.7 (0.8)                    | 543.4 (1)    | 537.2 (1)                        | 548.8 (2)    | 609.9 (1)                      | 623.1 (2)    |
| 436.9 (18)                     | 452.4 (4)    | 460.3 (8)                      | 474.2 (9)    | 405.2 (12)                       | 423.5 (14)   | 510.7 (49)                     | 532.0 (43)   |
| 350.0 (4)                      | 358.9 (4)    | 363.5 (0.8)                    | 372.3 (0.8)  | 362.6 (2)                        | 372.9 (2)    | 440.4 (0.9)                    | 450.3 (0.9)  |
| 312.6 (3)                      | 318.7 (2)    | 317.3 (0.4)                    | 324.8 (0.4)  | 310.4 (0.2)                      | 321.0 (0.2)  | 371.2 (42)                     | 386.7 (30)   |
| 253.4 (0.9)                    | 263.9 (0.6)  | 259.3 (0.3)                    | 263.0 (0.2)  | 254.5 (2)                        | 265.1 (2)    | 231.5 (4)                      | 241.9 (3)    |
| 126.1 (0.6)                    | 128.4 (0.6)  | 171.9 (2)                      | 175.9 (2)    | 194.0 (3)                        | 197.3 (3)    | 181.7 (1)                      | 184.8 (1)    |
| 57.7 (2)                       | 58.2 (2)     | 52.4 (< 0.1)                   | 53.2 (< 0.1) | 139.7 (0.2)                      | 142.9 (0.2)  | 58.4 (< 0.1)                   | 60.6 (< 0.1) |
| 35.8 (0.7)                     | 35.1 (0.7)   | 41.2 (< 0.1)                   | 48.6 (< 0.1) | 46.5 (0.3)                       | 48.1 (0.3)   | 32.3 (0.1)                     | 33.9 (0.1)   |



**Table S2.** Calculated IR frequencies ( $\text{cm}^{-1}$ ) and intensity ( $\text{km mol}^{-1}$ , in parentheses) of  $\text{CF}_3\text{S}\bullet$  at the MPW1PW91, B3LYP and BP86 methods using 6-311+G(3df) basis set.

| $\text{CF}_3\text{S}\bullet$ |              |               | $\bullet\text{CF}_2\text{SF}$ |              |              |
|------------------------------|--------------|---------------|-------------------------------|--------------|--------------|
| MPW1PW91                     | B3LYP        | BP86          | MPW1PW91                      | B3LYP        | BP86         |
| 1181.2 (255)                 | 1134.1 (253) | 1071.9 (243)  | 1339.9 (300)                  | 1304.4 (314) | 1271.1 (326) |
| 1172.0 (282)                 | 1123.7 (284) | 1055.9 (329)  | 1278.6 (246)                  | 1232.9 (244) | 1173.6 (232) |
| 1136.4 (370)                 | 1102.5 (359) | 1040.4 (276)  | 734.9 (4)                     | 721.3 (4)    | 714.9 (7)    |
| 778.5 (11)                   | 758.2 (10)   | 727.9 (8)     | 592.8 (159)                   | 522.3 (155)  | 478.9 (88)   |
| 545.3 (2)                    | 535.0 (1)    | 512.4 (1)     | 500.0 (16)                    | 489.8 (13)   | 466.8 (58)   |
| 543.8 (0.5)                  | 532.6 (0.3)  | 509.2 (< 0.1) | 392.2 (4)                     | 391.7 (8)    | 413.1 (13)   |
| 459.1 (3)                    | 445.8 (3)    | 431.8 (2)     | 373.9 (0.3)                   | 367.1 (0.2)  | 353.4 (1)    |
| 293.3 (0.3)                  | 288.8 (0.3)  | 270.4 (0.3)   | 183.1 (3)                     | 177.6 (3)    | 157.7 (2)    |
| 207.9 (0.5)                  | 201.7 (0.6)  | 198.4 (0.7)   | 105.0 (1)                     | 115.8 (1)    | 131.8 (2)    |

**Table S3.** Calculated vertical transitions (nm) for  $\text{CF}_3\text{S}\bullet$ .

| EOM <sup>[a]</sup> | CASSCF <sup>[b]</sup> | MRCI+Q | TD-B3LYP <sup>[c]</sup> |
|--------------------|-----------------------|--------|-------------------------|
| 19410 (0)          | 17854.0               | 22960  | 11092.1 (0)             |
| 322.4 (0.0029)     | 287.3                 | 324.9  | 370.9 (0.0006)          |
| 211.3 (0)          | 164.7                 | 178.3  | 236.8 (0.0006)          |
| 181.2 (0.0012)     |                       |        | 225.5 (0)               |
|                    |                       |        | 212.7 (0.0001)          |
|                    |                       |        | 209.6 (0.0094)          |
|                    |                       |        | 193.9 (0.0001)          |

[a] At the EOM-CCSD/aug-cc-pV(T+d)Z level of theory. The oscillator strengths are given in parentheses. [b] The CASSCF/aug-cc-pv(T+d)z active space is (21,15) and all CI configurations with weight greater than 0.01 were considered. Calculation were done in  $C_s$  symmetry at the optimized equilibrium geometry at CCSD(T)/aug-cc-pv(T+d)z. [c] At the 6-311+G(3df) basis set.

**Table 4.** Computed and observed IR data for  $\bullet\text{CF}_2\text{SF}$ .

| $\nu_{\text{cal}}^{\text{[a]}}$ | $\nu_{\text{obs}}^{\text{[b]}}$ |           | Mode <sup>[c]</sup>                   |
|---------------------------------|---------------------------------|-----------|---------------------------------------|
| CCSD(T)                         | $\text{N}_2$ -matrix            | Ar-matrix | $\bullet\text{CF}_2\text{SF}$         |
| 1315.3                          | 1301.9                          | 1299.1    | $\nu_1, \nu_s(\text{CF}_2)$           |
| 1265.5                          | 1237.2                          | 1232.6    | $\nu_2, \nu_{\text{as}}(\text{CF}_2)$ |
| 712.4                           | 713.2                           | 710.7     | $\nu_3, \nu(\text{CS})$               |
| 623.3                           | 578.1                           | 583.4     | $\nu_4, \nu(\text{SF})$               |
| 494.4                           | 491.4                           | 490.3     | $\nu_5, \delta(\text{CF}_2)$          |

[a] Harmonic IR frequencies calculated harmonic frequencies at the aug-cc-pV(T+d)Z basis set. [b] Observed band positions for the most intense matrix sites. [c] Tentative assignment of the vibration modes based on the computed vibrational displacement vectors for  $\bullet\text{CF}_2\text{SF}$ .

**Table S5.** Computed and observed IR data for CF<sub>3</sub>SOO•.

| $\nu_{\text{cal}}^{[a]}$ | $\nu_{\text{obs}}^{[b]}$ |                        | $\Delta\nu(\text{O}/^{18}\text{O})^{[c]}$ |      | Mode <sup>[d]</sup>                   |
|--------------------------|--------------------------|------------------------|-------------------------------------------|------|---------------------------------------|
|                          | CCSD(T)                  | N <sub>2</sub> -matrix | Ne-matrix                                 | obs  |                                       |
| 1172.9                   | 1185.1                   | 1189.5                 | < 0.5                                     | 0.2  | $\nu_1, \nu_{\text{as}}(\text{CF}_3)$ |
| 1169.2                   | 1176.1                   | 1183.8                 | < 0.5                                     | -0.1 | $\nu_2, \nu_{\text{as}}(\text{CF}_3)$ |
| 1118.9                   | 1124.1                   | 1126.9                 | < 0.5                                     | 0.4  | $\nu_3, \nu_s(\text{CF}_3)$           |
| 1013.7                   | 1017.6                   | 1016.6                 | 55.5                                      | 56.2 | $\nu_4, \nu(\text{OO})$               |
| 741.0                    | 764.4                    | 765.1                  | 0.5                                       | -0.1 | $\nu_5, \delta(\text{CF}_3)$          |
| 584.4                    | 558.6                    | 559.0                  | 18.8                                      | 28.6 | $\nu_6, \nu(\text{SO})$               |
| 539.6                    | n.o. <sup>[e]</sup>      | n.o. <sup>[e]</sup>    | n.o.                                      | 0.1  | $\nu_7, \delta(\text{CF}_3)$          |
| 520.2                    | 540.0                    | 539.7                  | < 0.5                                     | 0.3  | $\nu_8, \delta(\text{CF}_3)$          |
| 461.0                    | 463.3                    | 465.1                  | < 0.5                                     | 5.6  | $\nu_9, \nu(\text{CS})$               |

[a] Harmonic IR frequencies ( $> 400 \text{ cm}^{-1}$ ) calculated at the aug-cc-pV(D+d)Z basis set. Full list of the calculated IR frequencies is given in Table S7. [b] Observed band positions for the most intense matrix sites. [c] Observed and calculated <sup>18</sup>O-isotopic shifts. [d] Tentative assignment of the vibration modes based on the computed vibrational displacement vectors. [e] Not observed due to low intensity.

**Table S6.** Calculated vertical transitions (nm) for CF<sub>3</sub>SOO•.

| EOM <sup>[a]</sup> | CASSCF <sup>[b]</sup> | TD-B3LYP <sup>[c]</sup> |
|--------------------|-----------------------|-------------------------|
| 1211 (0)           | 1227                  | 1045.2 (0)              |
| 354.4 (0)          | 398.6                 | 437.3 (0.0005)          |
| 302.7 (0.0022)     | 386.2                 | 392.1 (0)               |
| 295.8 (0.0003)     |                       | 342.2 (0.0012)          |
|                    |                       | 303.5 (0.0006)          |
|                    |                       | 283.8 (0.0006)          |
|                    |                       | 252.9 (0.0170)          |
|                    |                       | 229.3 (0.1240)          |
|                    |                       | 217.4 (0.0001)          |
|                    |                       | 207.4 (0.0006)          |

[a] At the EOM-CCSD/aug-cc-pV(T+d)Z level of theory. The oscillator strengths are given in parentheses. [b] CASSCF/aug-cc-pv(D+d)Z with an active space (15,14). [c] At the 6-311+G(3df) basis set.

**Table S7.** Calculated IR frequencies ( $\text{cm}^{-1}$ ) and intensity ( $\text{km mol}^{-1}$ , in parentheses) of  $\text{CF}_3\text{SOO}\bullet$ ,  $\text{CF}_3\text{OSO}\bullet$  and  $\text{CF}_3\text{SO}_2\bullet$  at the MPW1PW91, B3LYP and BP86 methods using 6-311+G(3df) basis set.

| $\text{CF}_3\text{SOO}\bullet$ |              |              | $\text{CF}_3\text{OSO}\bullet$ |              |              | $\text{CF}_3\text{SO}_2\bullet$ |              |              |
|--------------------------------|--------------|--------------|--------------------------------|--------------|--------------|---------------------------------|--------------|--------------|
| MPW1PW91                       | B3LYP        | BP86         | MPW1PW91                       | B3LYP        | BP86         | MPW1PW91                        | B3LYP        | BP86         |
| 1210.8 (217)                   | 1164.6 (219) | 1279.9 (226) | 1281.7 (402)                   | 1236.2 (408) | 1172.3 (371) | 1350.9 (221)                    | 1301.3 (217) | 1239.8 (208) |
| 1207.0 (255)                   | 1162.0 (256) | 1093.6 (237) | 1243.7 (226)                   | 1206.5 (183) | 1158.2 (121) | 1267.7 (157)                    | 1224.4 (263) | 1168.9 (277) |
| 1156.8 (58)                    | 1116.0 (117) | 1074.1 (118) | 1217.5 (242)                   | 1170.6 (264) | 1109.7 (267) | 1267.7 (283)                    | 1223.4 (177) | 1168.3 (149) |
| 1129.9 (358)                   | 1090.6 (307) | 1028.5 (404) | 1175.2 (526)                   | 1136.9 (547) | 1081.6 (587) | 1144.3 (19)                     | 1101.7 (12)  | 1046.6 (15)  |
| 780.3 (14)                     | 760.3 (14)   | 730.3 (15)   | 948.7 (76)                     | 919.7 (67)   | 872.1 (54)   | 1081.4 (352)                    | 1043.8 (371) | 989.6 (351)  |
| 623.0 (4)                      | 579.0 (8)    | 563.5 (18)   | 761.1 (91)                     | 729.1 (88)   | 685.4 (88)   | 758.3 (28)                      | 734.7 (33)   | 701.6 (36)   |
| 565.1 (0.9)                    | 552.8 (0.5)  | 512.7 (0.3)  | 659.9 (1)                      | 646.2 (0.5)  | 617.4 (0.4)  | 564.4 (2)                       | 551.1 (1)    | 524.9 (0.5)  |
| 544.6 (1)                      | 534.1 (0.9)  | 511.5 (7)    | 626.5 (5)                      | 613.4 (4)    | 584.1 (2)    | 551.7 (1)                       | 539.5 (0.8)  | 515.3 (0.4)  |
| 469.0 (8)                      | 454.6 (7)    | 403.3 (10)   | 544.8 (43)                     | 527.3 (48)   | 503.6 (50)   | 499.2 (38)                      | 487.8 (36)   | 459.3 (29)   |
| 421.0 (0.1)                    | 390.3 (0.6)  | 335.8 (15)   | 473.3 (7)                      | 462.0 (7)    | 437.1 (6)    | 450.2 (20)                      | 431.9 (19)   | 402.7 (14)   |
| 325.1 (0.4)                    | 317.0 (0.5)  | 300.5 (0.1)  | 406.4 (19)                     | 397.6 (24)   | 378.5 (22)   | 334.9 (0.3)                     | 322.7 (0.2)  | 300.6 (0.2)  |
| 297.3 (0.2)                    | 284.7 (0.7)  | 202.4 (16)   | 315.1 (2)                      | 304.0 (3)    | 286.6 (4)    | 276.9 (1)                       | 256.5 (1)    | 232.8 (1)    |
| 172.8 (1)                      | 166.2 (0.9)  | 115.2 (0.2)  | 178.4 (1)                      | 175.9 (1)    | 165.0 (1)    | 203.7 (5)                       | 198.1 (4)    | 181.4 (3)    |
| 69.4 (0.4)                     | 60.3 (0.4)   | 66.2 (< 0.1) | 73.3 (1)                       | 69.3 (1)     | 60.9 (0.8)   | 171.9 (1)                       | 168.8 (1)    | 154.8 (1)    |
| 52.2 (0.3)                     | 50.8 (0.4)   | 30.6 (< 0.1) | 37.7 (3)                       | 36.1 (3)     | 32.1 (3)     | 50.2 (0.3)                      | 47.4 (0.3)   | 42.9 (0.3)   |

**Table S8.** Calculated vertical transitions (nm) for •CF<sub>2</sub>SF.

| EOM <sup>[a]</sup> | CASSCF <sup>[b]</sup> | MRCI+Q | TD-B3LYP <sup>[c]</sup> |
|--------------------|-----------------------|--------|-------------------------|
| 526.4 (0.0011)     | 612                   | 641.0  | 592.8 (0.0015)          |
| 278.5 (0.0212)     | 264                   | 281.7  | 316.3 (0.0219)          |
| 241.7 (0.0090)     |                       |        | 271.4 (0.0018)          |
| 238.0 (0.0075)     |                       |        | 267.6 (0.0036)          |
|                    |                       |        | 227.7 (0.0047)          |
|                    |                       |        | 210.3 (0.0337)          |
|                    |                       |        | 202.1 (0.0173)          |
|                    |                       |        | 198.3 (0.0101)          |
|                    |                       |        | 194.0 (0.0142)          |
|                    |                       |        | 190.5 (0.0302)          |

[a] At the EOM-CCSD/aug-cc-pV(T+d)Z level of theory. The oscillator strengths are given in parentheses. [b] The CASSCF/aug-cc-pv(T+d)z active space is (15,13) and all CI configurations with weight greater than 0.02 were considered. Calculation were done in C<sub>1</sub> symmetry using at the optimized equilibrium geometry at CCSD(T)/aug-cc-pv(T+d)z. [c] At the 6-311+G(3df) basis set.

Calculated atomic coordinates (in Angstroms) and energies (in Hartrees) for all optimized structures.

**CF<sub>3</sub>S•**

B3LYP/6-311+G(3df)

|                                              |             |             |             |
|----------------------------------------------|-------------|-------------|-------------|
| C                                            | -0.32581400 | -0.02808700 | 0.00000000  |
| F                                            | -0.80668100 | 1.22351300  | 0.00000000  |
| F                                            | -0.80668100 | -0.66249000 | 1.07580600  |
| F                                            | -0.80668100 | -0.66249000 | -1.07580600 |
| S                                            | 1.48345400  | 0.06760700  | 0.00000000  |
| Zero-point correction=                       |             | 0.013949    |             |
| Thermal correction to Energy=                |             | 0.018602    |             |
| Thermal correction to Enthalpy=              |             | 0.019546    |             |
| Thermal correction to Gibbs Free Energy=     |             | -0.015216   |             |
| Sum of electronic and zero-point Energies=   |             | -735.921357 |             |
| Sum of electronic and thermal Energies=      |             | -735.916704 |             |
| Sum of electronic and thermal Enthalpies=    |             | -735.915760 |             |
| Sum of electronic and thermal Free Energies= |             | -735.950522 |             |

UCCSD(T)/aug-cc-pV(T+d)Z

|   |             |             |            |
|---|-------------|-------------|------------|
| S | 0.00000000  | 0.00000000  | 0.00000000 |
| C | 0.00000000  | 0.00000000  | 1.81524773 |
| F | 1.27109873  | 0.00000000  | 2.23185027 |
| F | -0.60578518 | 1.07848777  | 2.32241142 |
| F | -0.60778568 | -1.06652598 | 2.31740908 |

**•CF<sub>2</sub>SF**

B3LYP/6-311+G(3df)

|                                              |             |             |             |
|----------------------------------------------|-------------|-------------|-------------|
| F                                            | -1.63407600 | -0.77431900 | 0.47265300  |
| C                                            | -0.72133800 | -0.02388600 | -0.11150100 |
| F                                            | -1.16084200 | 1.20618300  | -0.24054800 |
| S                                            | 0.82815300  | -0.50378300 | -0.41755100 |
| F                                            | 1.80353800  | 0.47967400  | 0.58454100  |
| Zero-point correction=                       |             | 0.012127    |             |
| Thermal correction to Energy=                |             | 0.017491    |             |
| Thermal correction to Enthalpy=              |             | 0.018436    |             |
| Thermal correction to Gibbs Free Energy=     |             | -0.018007   |             |
| Sum of electronic and zero-point Energies=   |             | -735.879753 |             |
| Sum of electronic and thermal Energies=      |             | -735.874389 |             |
| Sum of electronic and thermal Enthalpies=    |             | -735.873445 |             |
| Sum of electronic and thermal Free Energies= |             | -735.909888 |             |

UCCSD(T)/aug-cc-pV(T+d)Z ENERGY=-734.91431399

|   |               |               |               |
|---|---------------|---------------|---------------|
| C | -0.0429281150 | -0.1561965337 | -0.7198102422 |
| S | -0.4485182969 | -0.4756541275 | 0.8669300206  |
| F | 0.4208327208  | 0.6392234865  | 1.7537904493  |
| F | 1.1888871911  | -0.2068719214 | -1.1822474243 |
| F | -0.8257010557 | 0.4690688276  | -1.5794243528 |

***cis*-CF<sub>3</sub>SOO•**

B3LYP/6-311+G(3df)

|   |             |             |             |
|---|-------------|-------------|-------------|
| C | 0.91428100  | 0.12648600  | -0.00471000 |
| S | -0.46963000 | -1.06330800 | -0.10939700 |

|                                              |             |             |             |
|----------------------------------------------|-------------|-------------|-------------|
| F                                            | 1.99452400  | -0.53012600 | -0.44624400 |
| F                                            | 0.72465800  | 1.20473600  | -0.76204100 |
| F                                            | 1.14214900  | 0.54210300  | 1.24027200  |
| O                                            | -1.69922100 | 0.01534100  | 0.54185300  |
| O                                            | -2.39122500 | 0.64760900  | -0.35551000 |
| Zero-point correction=                       |             | 0.019784    |             |
| Thermal correction to Energy=                |             | 0.027034    |             |
| Thermal correction to Enthalpy=              |             | 0.027978    |             |
| Thermal correction to Gibbs Free Energy=     |             | -0.013981   |             |
| Sum of electronic and zero-point Energies=   |             | -886.301457 |             |
| Sum of electronic and thermal Energies=      |             | -886.294206 |             |
| Sum of electronic and thermal Enthalpies=    |             | -886.293262 |             |
| Sum of electronic and thermal Free Energies= |             | -886.335222 |             |

UCCSD(T)/aug-cc-pV(D+d)Z ENERGY=-884.66375315

|   |               |               |               |
|---|---------------|---------------|---------------|
| S | 0.1328123766  | -1.1154751219 | -0.4765464492 |
| C | 0.0023292982  | 0.1154543298  | 0.8569533791  |
| O | -0.5549494095 | -0.0311232565 | -1.7183814540 |
| F | 0.4547185389  | -0.4861732350 | 1.9847971132  |
| F | -1.2669867673 | 0.5239284347  | 1.0645022702  |
| F | 0.7463763539  | 1.2160626207  | 0.6247773523  |
| O | 0.3653109474  | 0.6908276336  | -2.3327941121 |

#### **trans-CF<sub>3</sub>SOO•**

B3LYP/6-311+G(3df)

|                                              |             |             |             |
|----------------------------------------------|-------------|-------------|-------------|
| C                                            | 1.00054400  | -0.08531200 | 0.00007400  |
| S                                            | -0.52902100 | 0.91122900  | -0.00018800 |
| F                                            | 2.00965800  | 0.79413800  | 0.00037500  |
| F                                            | 1.10649500  | -0.86339700 | 1.07542400  |
| F                                            | 1.10694400  | -0.86320100 | -1.07537600 |
| O                                            | -1.59797500 | -0.51006100 | -0.00085100 |
| O                                            | -2.84537500 | -0.19939400 | 0.00069500  |
| Zero-point correction=                       |             | 0.019656    |             |
| Thermal correction to Energy=                |             | 0.027127    |             |
| Thermal correction to Enthalpy=              |             | 0.028071    |             |
| Thermal correction to Gibbs Free Energy=     |             | -0.015684   |             |
| Sum of electronic and zero-point Energies=   |             | -886.300701 |             |
| Sum of electronic and thermal Energies=      |             | -886.293230 |             |
| Sum of electronic and thermal Enthalpies=    |             | -886.292286 |             |
| Sum of electronic and thermal Free Energies= |             | -886.336041 |             |

#### **CF<sub>3</sub>OSO•**

B3LYP/6-311+G(3df)

|                               |             |             |             |
|-------------------------------|-------------|-------------|-------------|
| C                             | -1.02415300 | -0.03570100 | -0.01897700 |
| F                             | -2.04660700 | -0.15836100 | -0.85368500 |
| F                             | -0.86119300 | -1.18516300 | 0.64055500  |
| F                             | -1.31903200 | 0.90984500  | 0.88467600  |
| O                             | 2.29078400  | -0.77842800 | -0.01087000 |
| O                             | 0.07941800  | 0.29760600  | -0.75453600 |
| S                             | 1.57654900  | 0.49774300  | 0.01207500  |
| Zero-point correction=        |             | 0.021942    |             |
| Thermal correction to Energy= |             | 0.028730    |             |

|                                              |             |
|----------------------------------------------|-------------|
| Thermal correction to Enthalpy=              | 0.029674    |
| Thermal correction to Gibbs Free Energy=     | -0.011648   |
| Sum of electronic and zero-point Energies=   | -886.436063 |
| Sum of electronic and thermal Energies=      | -886.429275 |
| Sum of electronic and thermal Enthalpies=    | -886.428331 |
| Sum of electronic and thermal Free Energies= | -886.469653 |

### CF<sub>3</sub>SO<sub>2</sub>•

B3LYP/6-311+G(3df)

|                                              |             |             |             |
|----------------------------------------------|-------------|-------------|-------------|
| C                                            | 0.88755500  | -0.00004200 | -0.00746700 |
| O                                            | -1.50034900 | -1.27138000 | -0.19502400 |
| F                                            | 1.40285000  | 1.08456800  | 0.54296500  |
| F                                            | 1.40338700  | -1.08278500 | 0.54536400  |
| F                                            | 1.10767700  | -0.00142200 | -1.30968700 |
| S                                            | -1.03369400 | 0.00001100  | 0.32247500  |
| O                                            | -1.50108200 | 1.27098400  | -0.19529800 |
| Zero-point correction=                       | 0.021947    |             |             |
| Thermal correction to Energy=                | 0.028759    |             |             |
| Thermal correction to Enthalpy=              | 0.029704    |             |             |
| Thermal correction to Gibbs Free Energy=     | -0.010863   |             |             |
| Sum of electronic and zero-point Energies=   | -886.397604 |             |             |
| Sum of electronic and thermal Energies=      | -886.390791 |             |             |
| Sum of electronic and thermal Enthalpies=    | -886.389847 |             |             |
| Sum of electronic and thermal Free Energies= | -886.430413 |             |             |

### CF<sub>3</sub>SSO•

B3LYP/6-311+G(3df)

|                                              |              |             |             |
|----------------------------------------------|--------------|-------------|-------------|
| C                                            | 1.21024900   | 0.15000600  | 0.00657600  |
| F                                            | 0.99818100   | 1.27294400  | -0.68026200 |
| F                                            | 1.32557400   | 0.48219200  | 1.29644800  |
| F                                            | 2.36906200   | -0.38124000 | -0.39569000 |
| S                                            | -0.09279900  | -1.11381900 | -0.28042700 |
| S                                            | -1.79414900  | -0.08158300 | 0.46042400  |
| O                                            | -2.41320800  | 0.73266900  | -0.61298500 |
| Zero-point correction=                       | 0.019014     |             |             |
| Thermal correction to Energy=                | 0.026581     |             |             |
| Thermal correction to Enthalpy=              | 0.027525     |             |             |
| Thermal correction to Gibbs Free Energy=     | -0.015918    |             |             |
| Sum of electronic and zero-point Energies=   | -1209.406697 |             |             |
| Sum of electronic and thermal Energies=      | -1209.399129 |             |             |
| Sum of electronic and thermal Enthalpies=    | -1209.398185 |             |             |
| Sum of electronic and thermal Free Energies= | -1209.441628 |             |             |

### CF<sub>3</sub>SOS•

B3LYP/6-311+G(3df)

|   |             |             |             |
|---|-------------|-------------|-------------|
| C | 1.23770100  | -0.17858100 | -0.00905800 |
| F | 2.33809100  | 0.28677600  | -0.61486600 |
| F | 0.87366200  | -1.32251000 | -0.59374200 |
| F | 1.53135500  | -0.45775700 | 1.26075500  |
| S | -0.01743300 | 1.13336900  | -0.17963500 |
| O | -1.27508600 | 0.34790800  | 0.65928500  |

|                                              |             |              |             |
|----------------------------------------------|-------------|--------------|-------------|
| S                                            | -2.47716000 | -0.40026600  | -0.17594300 |
| Zero-point correction=                       |             | 0.018891     |             |
| Thermal correction to Energy=                |             | 0.026278     |             |
| Thermal correction to Enthalpy=              |             | 0.027222     |             |
| Thermal correction to Gibbs Free Energy=     |             | -0.015747    |             |
| Sum of electronic and zero-point Energies=   |             | -1209.352900 |             |
| Sum of electronic and thermal Energies=      |             | -1209.345512 |             |
| Sum of electronic and thermal Enthalpies=    |             | -1209.344568 |             |
| Sum of electronic and thermal Free Energies= |             | -1209.387537 |             |

### CF<sub>3</sub>S(O)S•

B3LYP/6-311+G(3df)

|                                              |             |              |             |
|----------------------------------------------|-------------|--------------|-------------|
| C                                            | -1.07648000 | -0.22174400  | 0.01210800  |
| F                                            | -1.21913200 | -0.41574700  | 1.31307800  |
| F                                            | -1.18167600 | -1.37282900  | -0.63216800 |
| S                                            | 0.63268400  | 0.56802300   | -0.37388100 |
| O                                            | 0.59151200  | 1.88882500   | 0.26056900  |
| S                                            | 1.95452800  | -0.77106100  | 0.08980300  |
| F                                            | -2.00681600 | 0.61840600   | -0.41557000 |
| Zero-point correction=                       |             | 0.019947     |             |
| Thermal correction to Energy=                |             | 0.027139     |             |
| Thermal correction to Enthalpy=              |             | 0.028083     |             |
| Thermal correction to Gibbs Free Energy=     |             | -0.013724    |             |
| Sum of electronic and zero-point Energies=   |             | -1209.373889 |             |
| Sum of electronic and thermal Energies=      |             | -1209.366698 |             |
| Sum of electronic and thermal Enthalpies=    |             | -1209.365753 |             |
| Sum of electronic and thermal Free Energies= |             | -1209.407560 |             |

### CF<sub>3</sub>OSS•

B3LYP/6-311+G(3df)

|                                              |             |              |             |
|----------------------------------------------|-------------|--------------|-------------|
| C                                            | 1.34597000  | -0.10034300  | -0.02158300 |
| F                                            | 2.33693500  | -0.45234200  | -0.83390600 |
| F                                            | 1.05227900  | -1.14147800  | 0.76915200  |
| F                                            | 1.77956500  | 0.89093000   | 0.77389700  |
| S                                            | -2.42714200 | -0.55504900  | 0.00008000  |
| O                                            | 0.29442400  | 0.28124700   | -0.79238200 |
| S                                            | -1.13224700 | 0.84742900   | 0.00531200  |
| Zero-point correction=                       |             | 0.020284     |             |
| Thermal correction to Energy=                |             | 0.027377     |             |
| Thermal correction to Enthalpy=              |             | 0.028321     |             |
| Thermal correction to Gibbs Free Energy=     |             | -0.014279    |             |
| Sum of electronic and zero-point Energies=   |             | -1209.424484 |             |
| Sum of electronic and thermal Energies=      |             | -1209.417392 |             |
| Sum of electronic and thermal Enthalpies=    |             | -1209.416448 |             |
| Sum of electronic and thermal Free Energies= |             | -1209.459047 |             |



## References

- [1] A. D. Becke, *J. Chem. Phys.* **1993**, *98*, 5648–5652.
- [2] A. D. Becke, *Phys. Rev. A* **1988**, *38*, 3098–3100.
- [3] C. Adamo, V. Barone, *J. Chem. Phys.* **1998**, *108*, 664.
- [4] J. A. Montgomery Jr., M. J. Frisch, J. W. Ochterski, G. A. Petersson, *J. Chem. Phys.* **2000**, *112*, 6532–6542.
- [5] a) K. Fukui, *Acc. Chem. Res.* **1981**, *4*, 363–368; b) H. P. Hratchian, H. B. Schlegel, *J. Chem. Theory Comput.* **2005**, *1*, 61–69.
- [6] a) R. E. Stratmann, G. E. Scuseria, M. J. Frisch, *J. Chem. Phys.* **1998**, *109*, 8218; b) J. B. Foresman, M. Head-Gordon, J. A. Pople, M. J. Frisch, *J. Phys. Chem.* **1992**, *96*, 135–149.
- [7] T. Korona, H.-J. Werner, *J. Chem. Phys.* **2003**, *118*, 3006–3019.
- [8] M. J. Frisch, G. W. Trucks, H. B. Schlegel, G. E. Scuseria, M. A. Robb, J. R. Cheeseman, G. Scalmani, V. Barone, B. Mennucci, G. A. Petersson, H. Nakatsuji, M. Caricato, X. Li, H. P. Hratchian, A. F. Izmaylov, J. Bloino, G. Zheng, J. L. Sonnenberg, M. Hada, M. Ehara, K. Toyota, R. Fukuda, J. Hasegawa, M. Ishida, T. Nakajima, Y. Honda, O. Kitao, H. Nakai, T. Vreven, J. A. Montgomery, Jr., J. E. Peralta, F. Ogliaro, M. Bearpark, J. J. Heyd, E. Brothers, K. N. Kudin, V. N. Staroverov, R. Kobayashi, J. Normand, K. Raghavachari, A. Rendell, J. C. Burant, S. S. Iyengar, J. Tomasi, M. Cossi, N. Rega, J. M. Millam, M. Klene, J. E. Knox, J. B. Cross, V. Bakken, C. Adamo, J. Jaramillo, R. Gomperts, R. E. Stratmann, O. Yazyev, A. J. Austin, R. Cammi, C. Pomelli, J. W. Ochterski, R. L. Martin, K. Morokuma, V. G. Zakrzewski, G. A. Voth, P. Salvador, J. J. Dannenberg, S. Dapprich, A. D. Daniels, Ö. Farkas, J. B. Foresman, J. V. Ortiz, J. Cioslowski, and D. J. Fox, Gaussian, Inc., Wallingford CT, Gaussian 09, Revision A.2.
- [9] a) P. J. Knowles and H.-J. Werner, *Chem. Phys. Lett.* **1985**, *115*, 259–267; b) H. J. Werner, P. J. Knowles, *J. Chem. Phys.* **1985**, *82*, 5053–5063.
- [10] a) H.-J. Werner, P. J. Knowles, *J. Chem. Phys.* **1988**, *89*, 5803–5814; b) P. J. Knowles and H.-J. Werner, *Chem. Phys. Lett.* **1988**, *145*, 514–522.
- [11] H.-J. Werner, P. J. Knowles, G. Knizia, F. R. Manby, M. Schütz, *Wiley Interdiscip. Rev.: Comput. Mol. Sci.* **2012**, *2*, 242–253.
